# Supplementary material
Source: publisher figshare collection journal article supplement (https://acs.figshare.com/ndownloader/files/24159249)
Supplement: Supplementary file 1 [file 24159249]

## Sheet: Table S2
Table S2. UNIPEPT taxonomical analysis of Swab R1, Swab R2, and simili swab R1-1pfu samples.
Sample	peptide	superkingdom	# specific peptides	class	# specific peptides	genus	# specific peptides	species	# specific peptides
simili swab R1_1pfu	LVQSGAEVR	Bacteria	3	Firmicutes	2	Bacillus	2	Bacillus enclensis	1
simili swab R1_1pfu	KPESDKPANEAPEK	Bacteria	3	Actinobacteria	1	Corynebacterium	1	Corynebacterium accolens	1
simili swab R1_1pfu	EMQAELQNEK	Bacteria	3	Firmicutes	2	Bacillus	2		0
Simili swab R2_1pfu	NTGDALPHGTK	Bacteria	2	Actinobacteria	1	Corynebacterium	1	Corynebacterium pseudodiphtheriticum	1
Simili swab R2_1pfu	AASTSSESSGVVAK	Bacteria	2	Firmicutes	1	Dolosigranulum	1	Dolosigranulum pigrum	1
Swab_R1	STVTVDEQGNVTASELR	Bacteria	22	Actinobacteria	10	Corynebacterium	8	Corynebacterium accolens	6
Swab_R1	VDEAQLTLNVSPDCGQK	Bacteria	22	Actinobacteria	10	Corynebacterium	8	Corynebacterium accolens	6
Swab_R1	DSSLTFTGHHDALYSNVK	Bacteria	22	Actinobacteria	10	Corynebacterium	8	Corynebacterium accolens	6
Swab_R1	LSEPLVPETGK	Bacteria	22	Actinobacteria	10	Corynebacterium	8	Corynebacterium accolens	6
Swab_R1	SYATTDAPTSFTQTGSDLFLGK	Bacteria	22	Actinobacteria	10	Corynebacterium	8	Corynebacterium accolens	6
Swab_R1	DQPVDQSGDDAALSTFK	Bacteria	22	Actinobacteria	10	Corynebacterium	8	Corynebacterium accolens	6
Swab_R1	MTQLCFETFNSPAFYVALQAVLSLYASGR	Fungi	14	Ustilaginomycetes	1	Anthracocystis	1	Anthracocystis flocculosa	1
Swab_R1	LVQSGAEVR	Bacteria	22	Bacilli	2	Bacillus	1	Bacillus enclensis	1
Swab_R1	QLLLTANNR	Bacteria	22	Gammaproteobacteria	1	Cellvibrio	1	Cellvibrio japonicus	1
Swab_R1	LLSYAQGFLLMR	Fungi	14	Tremellomycetes	1	Cutaneotrichosporon	1	Cutaneotrichosporon oleaginosum	1
Swab_R1	LLETECPAFQAR	Bacteria	22	Alphaproteobacteria	2	Enhydrobacter	1	Enhydrobacter aerosaccus	1
Swab_R1	QFTANNLQLDQLLFNWSFENTDQK	Bacteria	22	Flavobacteriia	1	Flavobacterium	1	Flavobacterium chilense	1
Swab_R1	VYQGERPLTK	Fungi	14	Agaricomycetes	7	Ganoderma	1	Ganoderma sinense	1
Swab_R1	FVGAPPNYTR	Fungi	14	Mucoromycetes	1	Hesseltinella	1	Hesseltinella vesiculosa	1
Swab_R1	GMSVLNSFVNDLFER	Fungi	14	Agaricomycetes	7	Hydnomerulius	1	Hydnomerulius pinastri	1
Swab_R1	LSLVNLAASNR	Archaea	2	Thermoprotei	1	Ignisphaera	1	Ignisphaera aggregans	1
Swab_R1	GNGGAAGGGGFANR	Bacteria	22	Bacilli	2	Lactobacillus	1	Lactobacillus equicursoris	1
Swab_R1	ALLLPPP	Fungi	14	Malasseziomycetes	1	Malassezia	1	Malassezia globosa	1
Swab_R1	DPALVELVK	Archaea	2	Halobacteria	1	Natronobacterium	1	Natronobacterium texcoconense	1
Swab_R1	LTNDYQLNLQSR	Fungi	14	Agaricomycetes	7	Paxillus	1	Paxillus rubicundulus	1
Swab_R1	LVESGAQLPAGGR	Bacteria	22	Actinobacteria	10	Ponticoccus	1	Ponticoccus gilvus	1
Swab_R1	QGLLPVLFTDK	Fungi	14	Agaricomycetes	7	Postia	1	Postia placenta	1
Swab_R1	NFPNALQHTLQWAR	Fungi	14	Agaricomycetes	7	Serendipita	1	Serendipita indica	1
Swab_R1	LVVAGASGGLGQPLSLLLK	Fungi	14	Sordariomycetes	1	Trichoderma	1	Trichoderma gamsii	1
Swab_R1	SQNTTVTGLEMFR	Bacteria	22	Actinobacteria	10	Corynebacterium	8		0
Swab_R1	FLGSALTDFNNQQDATSSHLEDAAK	Bacteria	22	Actinobacteria	10	Corynebacterium	8		0
Swab_R1	HNNLLGTFDLTGLPPAPR	Fungi	14	Saccharomycetes	1	Hanseniaspora	1		0
Swab_R1	FEQLNADLFR	Fungi	14	Agaricomycetes	7	Laccaria	1		0
Swab_R1	LNVYYNEAGTGK	Fungi	14	Microbotryomycetes	1	Microbotryum	1		0
Swab_R1	LANVFTMR	Bacteria	22		0		0		0
Swab_R1	QALLQASR	Bacteria	22		0		0		0
Swab_R1	LAGQLEALQR	Bacteria	22		0		0		0
Swab_R1	LVLEVAQHLGQSTVR	Bacteria	22	Alphaproteobacteria	2		0		0
Swab_R1	VALTGLSLAEYFR	Bacteria	22		0		0		0
Swab_R1	HGQSAWNLENR	Bacteria	22		0		0		0
Swab_R1	GLLAADESTNTLK	Bacteria	22		0		0		0
Swab_R1	LDSLTVG	Bacteria	22	Actinobacteria	10		0		0
Swab_R1	TTGLVMDSGDGVTHTVPLYEGFSLPHALLR	Fungi	14	Agaricomycetes	7		0		0
Swab_R2	ESLSETSEQLK	Bacteria	44	Bacilli	19	Dolosigranulum	15	Dolosigranulum pigrum	15
Swab_R2	GEEVGAAASEASENLR	Bacteria	44	Bacilli	19	Dolosigranulum	15	Dolosigranulum pigrum	15
Swab_R2	VPTLTGSMTEVYATLNK	Bacteria	44	Bacilli	19	Dolosigranulum	15	Dolosigranulum pigrum	15
Swab_R2	AASTSSESSGVVAK	Bacteria	44	Bacilli	19	Dolosigranulum	15	Dolosigranulum pigrum	15
Swab_R2	EGGDDVFVHFSALNDEGFK	Bacteria	44	Bacilli	19	Dolosigranulum	15	Dolosigranulum pigrum	15
Swab_R2	TLDEGQAVTFDLEEGDR	Bacteria	44	Bacilli	19	Dolosigranulum	15	Dolosigranulum pigrum	15
Swab_R2	LEEALLDTAVYEGK	Bacteria	44	Bacilli	19	Dolosigranulum	15	Dolosigranulum pigrum	15
Swab_R2	VSASPVTTDGLVNK	Bacteria	44	Bacilli	19	Dolosigranulum	15	Dolosigranulum pigrum	15
Swab_R2	QTVAEEFGQEAADALR	Bacteria	44	Bacilli	19	Dolosigranulum	15	Dolosigranulum pigrum	15
Swab_R2	VGLNDASLNNNTVR	Bacteria	44	Bacilli	19	Dolosigranulum	15	Dolosigranulum pigrum	15
Swab_R2	QQAQQPQELDLK	Bacteria	44	Bacilli	19	Dolosigranulum	15	Dolosigranulum pigrum	15
Swab_R2	QVGLEHFVVFLNK	Bacteria	44	Bacilli	19	Dolosigranulum	15	Dolosigranulum pigrum	15
Swab_R2	AVNPTDSEADK	Bacteria	44	Bacilli	19	Dolosigranulum	15	Dolosigranulum pigrum	15
Swab_R2	SENLANAK	Bacteria	44	Bacilli	19	Dolosigranulum	15	Dolosigranulum pigrum	15
Swab_R2	EVLANNPDQYDPR	Bacteria	44	Bacilli	19	Dolosigranulum	15	Dolosigranulum pigrum	15
Swab_R2	APVQFSYEVDGAPK	Bacteria	44	Actinobacteria	15	Corynebacterium	15	Corynebacterium pseudodiphtheriticum	5
Swab_R2	YSLGATNVGDGATK	Bacteria	44	Actinobacteria	15	Corynebacterium	15	Corynebacterium pseudodiphtheriticum	5
Swab_R2	GTNDNDSTLTWVTASGEK	Bacteria	44	Actinobacteria	15	Corynebacterium	15	Corynebacterium pseudodiphtheriticum	5
Swab_R2	SLEENQQVEFEVGEGAK	Bacteria	44	Actinobacteria	15	Corynebacterium	15	Corynebacterium pseudodiphtheriticum	5
Swab_R2	NTGDALPHGTK	Bacteria	44	Actinobacteria	15	Corynebacterium	15	Corynebacterium pseudodiphtheriticum	5
Swab_R2	AVNSQFSQSHVVSLSDK	Bacteria	44	Actinobacteria	15	Corynebacterium	15	Corynebacterium propinquum	4
Swab_R2	VTGTSTYPDNFAEFPNLK	Bacteria	44	Actinobacteria	15	Corynebacterium	15	Corynebacterium propinquum	4
Swab_R2	YVNHLDQGPQVSSAQFVGR	Bacteria	44	Actinobacteria	15	Corynebacterium	15	Corynebacterium propinquum	4
Swab_R2	LQLKPGELNLAQGDSYQVGTLAGGK	Bacteria	44	Actinobacteria	15	Corynebacterium	15	Corynebacterium propinquum	4
Swab_R2	FTQAVADAAR	Fungi	17	Dothideomycetes	2	Hortaea	2	Hortaea werneckii	2
Swab_R2	NTFSSQNVSYHEPLVR	Fungi	17	Dothideomycetes	2	Hortaea	2	Hortaea werneckii	2
Swab_R2	LGAGAPVYLGAVLEYLTAELLELAGNAAR	Fungi	17	Mucoromycetes	2	Absidia	1	Absidia repens	1
Swab_R2	MTQLCFETFNSPAFYVALQAVLSLYASGR	Fungi	17	Ustilaginomycetes	1	Anthracocystis	1	Anthracocystis flocculosa	1
Swab_R2	TSLALNTLLNQK	Bacteria	44	Bacilli	19	Atopostipes	1	Atopostipes suicloacalis	1
Swab_R2	LLSYAQGFLLMR	Fungi	17	Tremellomycetes	1	Cutaneotrichosporon	1	Cutaneotrichosporon oleaginosum	1
Swab_R2	DYTYQELLNR	Fungi	17	Agaricomycetes	6	Exidia	1	Exidia glandulosa	1
Swab_R2	QFTANNLQLDQLLFNWSFENTDQK	Bacteria	44	Flavobacteriia	1	Flavobacterium	1	Flavobacterium chilense	1
Swab_R2	QTDKPFSMPVEDVFSLTGR	Bacteria	44	Tissierellia	1	Helcococcus	1	Helcococcus kunzii	1
Swab_R2	VLSQLLTLMDGLK	Fungi	17	Agaricomycetes	6	Hypsizygus	1	Hypsizygus marmoreus	1
Swab_R2	QSLEQAAK	Bacteria	44	Bacilli	19	Marinilactibacillus	1	Marinilactibacillus psychrotolerans	1
Swab_R2	LTNDYQLNLQSR	Fungi	17	Agaricomycetes	6	Paxillus	1	Paxillus rubicundulus	1
Swab_R2	FQNALVLR	Bacteria	44	Epsilonproteobacteria	1	Sulfuricurvum	1	Sulfuricurvum kujiense	1
Swab_R2	SGYLSESR	Bacteria	44	Clostridia	1	Syntrophomonas	1	Syntrophomonas wolfei	1
Swab_R2	AEGVDNDQLHR	Bacteria	44	Actinobacteria	15	Corynebacterium	15		0
Swab_R2	LPAPLVDGSFETQLVLPTTDLQGKPLK	Bacteria	44	Actinobacteria	15	Corynebacterium	15		0
Swab_R2	DGAVATPTLDVSTTTVNAATGGDLTVR	Bacteria	44	Actinobacteria	15	Corynebacterium	15		0
Swab_R2	NNAENTAYQTR	Bacteria	44	Actinobacteria	15	Corynebacterium	15		0
Swab_R2	VEVTQDDYDQALR	Bacteria	44	Actinobacteria	15	Corynebacterium	15		0
Swab_R2	EAGFSDEETEQLVPVFR	Bacteria	44	Actinobacteria	15	Corynebacterium	15		0
Swab_R2	HNNLLGTFDLTGLPPAPR	Fungi	17	Saccharomycetes	1	Hanseniaspora	1		0
Swab_R2	FEQLNADLFR	Fungi	17	Agaricomycetes	6	Laccaria	1		0
Swab_R2	LNVYYNEAGTGK	Fungi	17	Microbotryomycetes	1	Microbotryum	1		0
Swab_R2	LSVYYNETGAGK	Fungi	17	Agaricomycetes	6	Sistotremastrum	1		0
Swab_R2	LANVFTMR	Bacteria	44		0		0		0
Swab_R2	VALTGLSLAEYFR	Bacteria	44		0		0		0
Swab_R2	HGQSAWNLENR	Bacteria	44		0		0		0
Swab_R2	ANLDTLVDALK	Bacteria	44		0		0		0
Swab_R2	GPQAANVDK	Bacteria	44	Bacilli	19		0		0
Swab_R2	GLETSVGDEGGFAPK	Bacteria	44	Bacilli	19		0		0
Swab_R2	LVNEPTAAALAYGLSR	Bacteria	44	Deltaproteobacteria	1		0		0
Swab_R2	LEEAGGEVELK	Bacteria	44		0		0		0
Swab_R2	MTQLMFETFNAPAFYVSLQAVLSLYASGR	Fungi	17		0		0		0
Swab_R2	TTGLVMDSGDGVTHTVPLYEGFSLPHALLR	Fungi	17	Agaricomycetes	6		0		0
Swab_R2	MTQLMFETFNSPAFYVSLQAVLSLYASGR	Fungi	17		0		0		0
Swab_R2	DSYVGDEAESK	Fungi	17		0		0		0
Swab_R2	MFVLDEADEMLAR	Fungi	17	Mucoromycetes	2		0		0
